# Supplementary material for: Graphene–carbon nanotube aerogel as an ultra-light, compressible and recyclable highly efficient absorbent for oil and dyes
Source: Royal Society of Chemistry journal article supplement (doi:10.1039/c5en00125k), 2015-10-13
Supplement: c5en00125k1.pdf [file c5en00125k1.pdf]

## Supporting Information

### **Graphene-carbon nanotube aerogel as an ultra-light, compressible and recyclable highly efficient absorbent for oil and dyes**

Wenchao Wan,<sup>a,b</sup> Ruiyang Zhang,<sup>b</sup> Wei Li,<sup>b</sup> Hao Liu,<sup>c</sup> Yuanhua Lin,<sup>a,b</sup> Lina Li,<sup>d</sup> and Ying Zhou<sup>a,b\*</sup>

a) State Key Laboratory of Oil and Gas Reservoir and Exploitation, Southwest Petroleum University, Chengdu 610500, China

b) The Center of New Energy Materials and Technology, School of Materials Science and Engineering, Southwest Petroleum University, Chengdu 610500, China

c) Chengdu Green Energy and Green Manufacturing Technology R&D Center, Chengdu 610207, China.

d) Shanghai Synchrotron Radiation Facility, Shanghai Institute of Applied Physics, Chinese Academy of Sciences, Shanghai 201204, China

\*To whom correspondence should be addressed

Email: [yzhou@swpu.edu.cn](mailto:yzhou@swpu.edu.cn) (Y. Zhou)

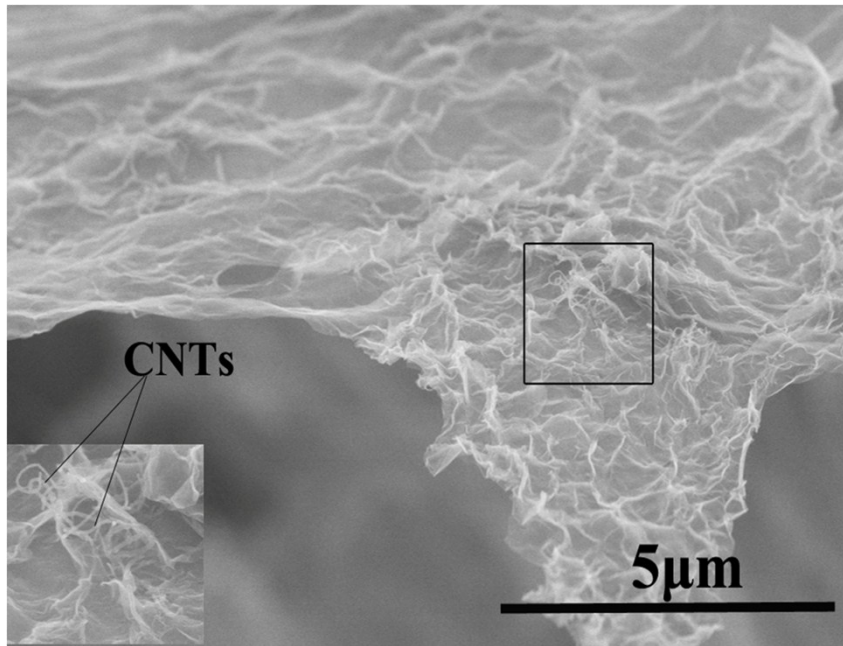

**Figure S1.** SEM of the graphene-CNTs aerogel with the GO/CNTs ratio of 7:1.

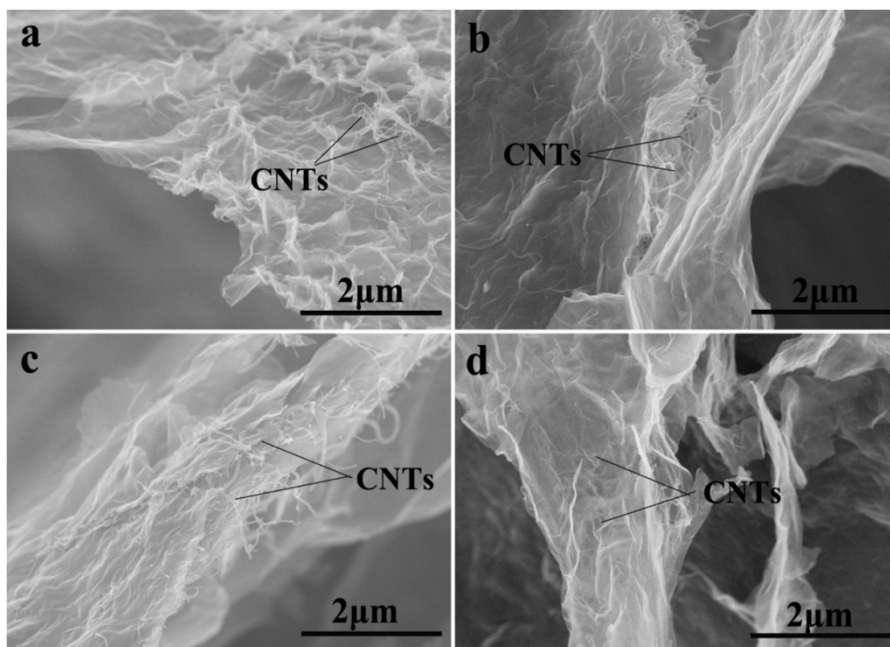

**Figure S2.** SEM of the graphene-CNTs aerogel with four kinds of existence forms between the CNTs and graphene sheets.

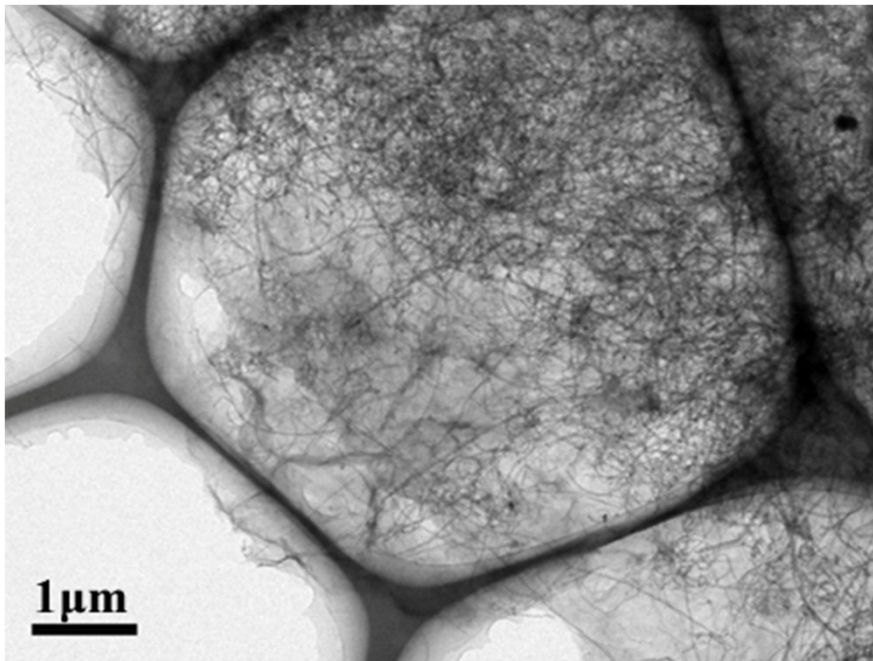

**Figure S3.** TEM image of the graphene-CNT aerogel with the GO/CNTs ratio of 3:1.

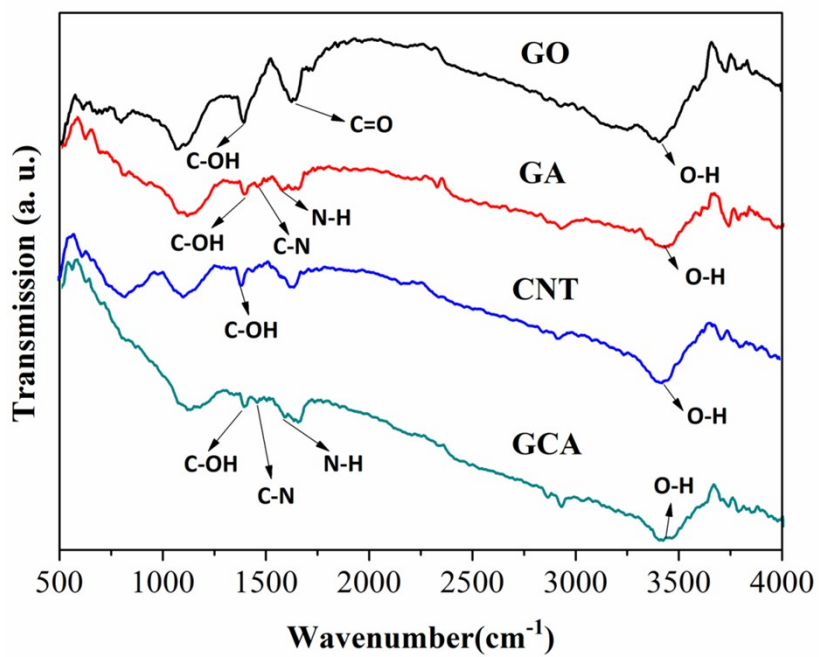

**Figure S4.** FT-IR spectra of GO, GA, CNT and GCA (GO/CNTs = 7:1).

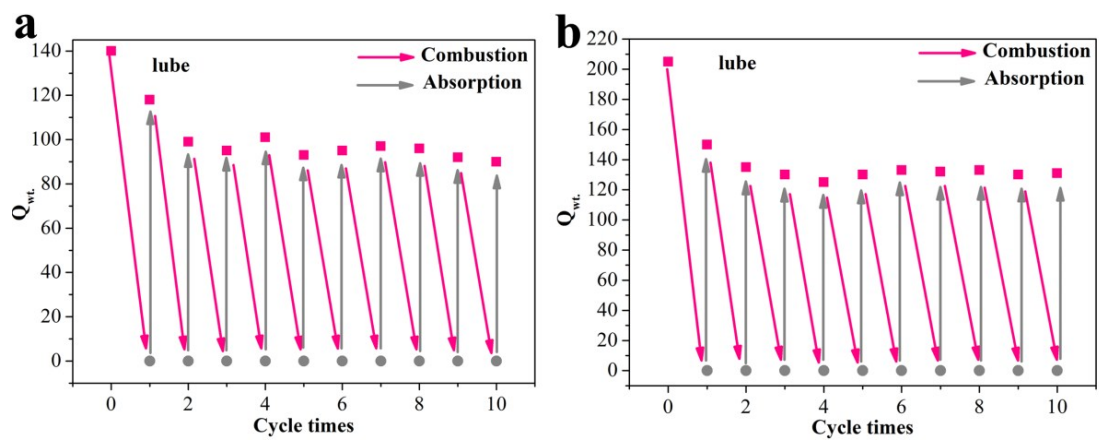

**Figure S5.** The combustion-adsorption of the aerogels (a) with ratio of 1:0, (b) with the ratio of 3:1.
